# Supplementary material for: Improved electrocatalytic activity of Pt catalyst supported on core–shell CMs@NiO for methanol oxidation
Source: Royal Society of Chemistry journal article supplement (doi:10.1039/d1nj01934a), 2021-01-01
Supplement: d1nj01934a1.pdf [file d1nj01934a1.pdf]

## Supporting Information

Improved electrocatalytic activity of Pt catalyst supported on core-shell CMs@NiO for methanol oxidation

Yongping Luo,<sup>\*a</sup> Wei Zhong,<sup>a</sup> Ping Huang,<sup>a,b</sup> Hui Ou,<sup>a</sup> Haiyan Fu,<sup>a</sup> Chen Liu,<sup>a</sup> Zonghu Xiao<sup>a</sup> and Shunjian Xu,<sup>\*a</sup>

a. Jiangxi Key Laboratory of Advanced Materials and Applications for Solar Cells, Xinyu University, Xinyu, Jiangxi 338004, China.

b. School of Materials Science and Engineering, Nanchang University, Nanchang, Jiangxi 330031, China.

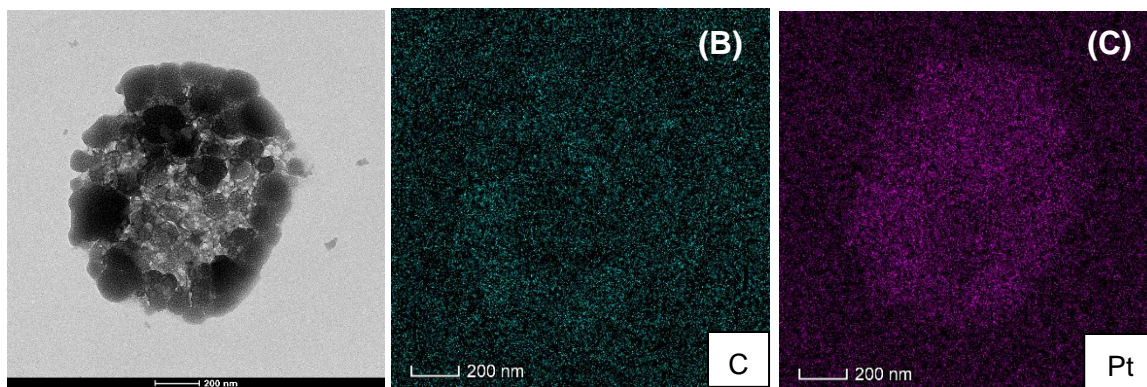

**Figure S1.** TEM of CMs/Pt (A) and the corresponding EDS dot mapping of the C (B), Pt (C) elements.

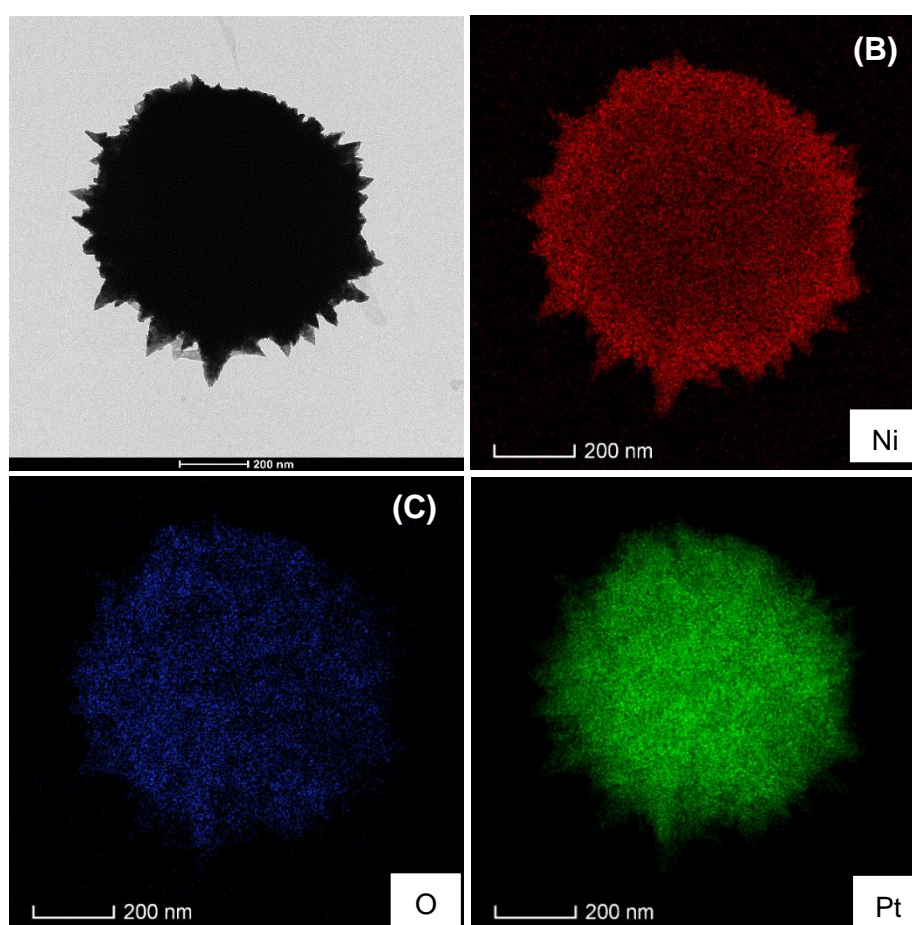

**Figure S2.** TEM of NiO/Pt (A) and the corresponding EDS dot mapping of the Ni (B), O (C) and Pt (D) elements.

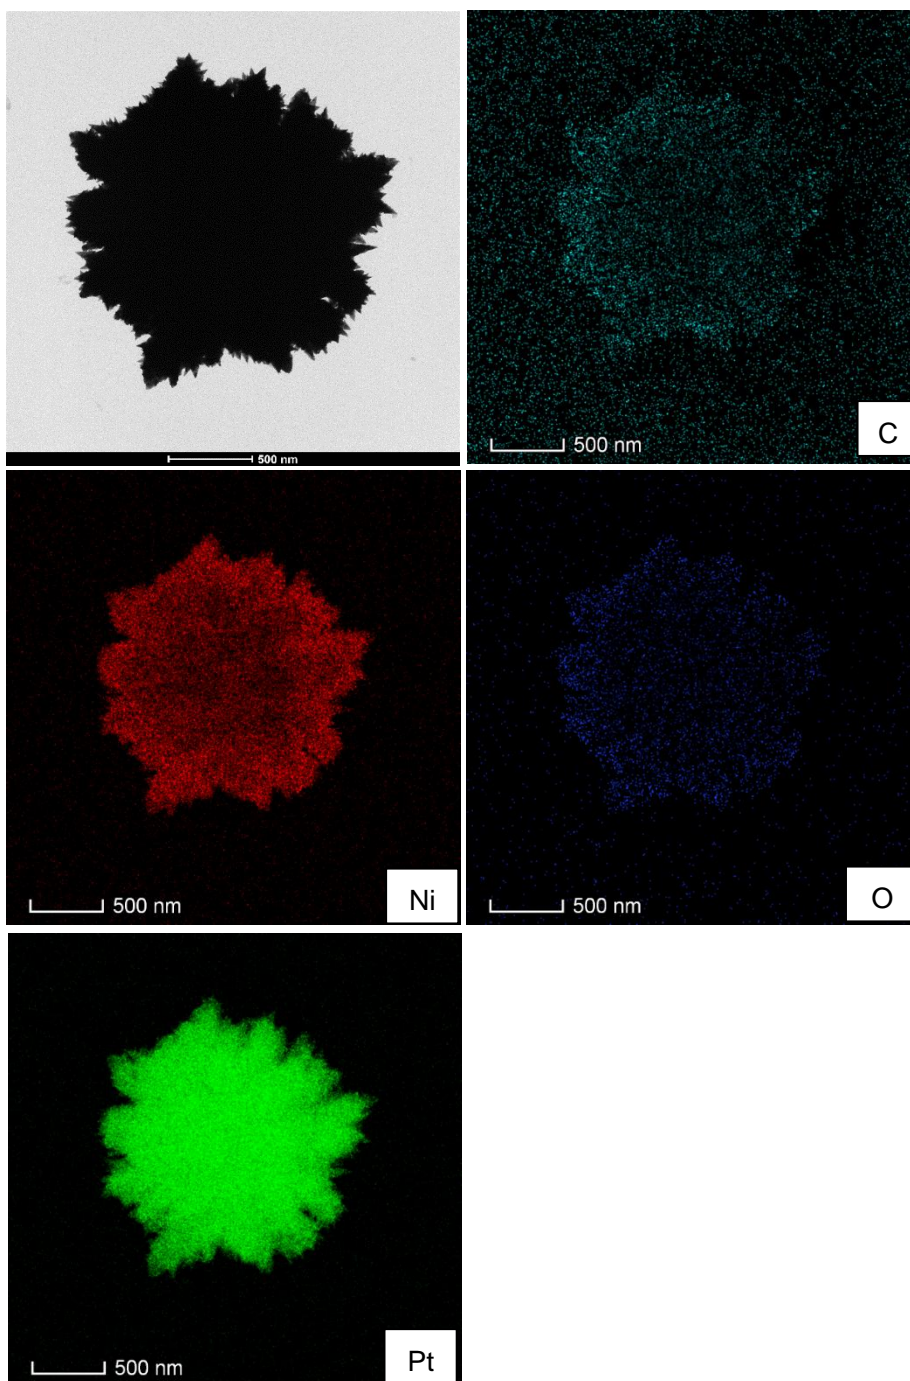

**Figure S3.** TEM of CMs@NiO/Pt (A) and the corresponding EDS dot mapping of the C (B), Ni (C), O (D) and Pt (E) elements.

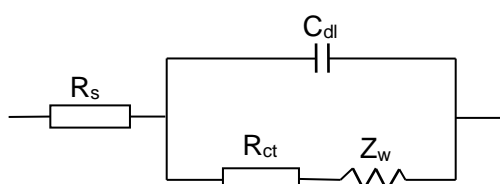

**Figure S4.** Equivalent circuit for an electrode undergoing heterogeneous electron transfer.

**Table S1.** The calculated data obtained from equivalent circuit

|            | $R_s$ ( $\Omega$ ) | $C_{dl}$ (F) | $R_{ct}$ ( $\Omega$ ) | $Z_w$ ( $\Omega$ ) |
|------------|--------------------|--------------|-----------------------|--------------------|
| CMs/Pt     | 1.000E-2           | 1.052E-11    | 197.9                 | 4.748E-5           |
| NiO/Pt     | 1.000E-2           | 1.153E-9     | 182.2                 | 1.022E-8           |
| CMs@NiO/Pt | 1.000E-1           | 1.378E-9     | 147.4                 | 8.974E-5           |
